# Supplementary material
Source: MDPI journal article supplement (https://www.mdpi.com/2073-4352/11/8/983)
Supplement: s1 [file s1]

## Supplementary Materials to the Manuscript Entitled

### New metakaolin-based geopolymers with the addition of different types of waste stone powder

Ivana Perná, Martina Novotná, Daniela Řimnáčová, Monika Šupová

**Table S1.** Particle-size analyses of the different types of waste stone powder

|           | below 1 $\mu\text{m}$ | below 5 $\mu\text{m}$ | below 10 $\mu\text{m}$ | below 36 $\mu\text{m}$ | below 63 $\mu\text{m}$ | below 90 $\mu\text{m}$ | Below 180 $\mu\text{m}$ | below 280 $\mu\text{m}$ | below 400 $\mu\text{m}$ | D10               | D50   | D90    |
|-----------|-----------------------|-----------------------|------------------------|------------------------|------------------------|------------------------|-------------------------|-------------------------|-------------------------|-------------------|-------|--------|
|           | (wt. %)               |                       |                        |                        |                        |                        |                         |                         |                         | ( $\mu\text{m}$ ) |       |        |
| Dolomite  | 8.06                  | 26.54                 | 37.83                  | 69.13                  | 81.47                  | 87.88                  | 94.41                   | 97.13                   | 100.00                  | 1.27              | 17.49 | 105.26 |
| Marble    | 12.60                 | 48.86                 | 68.18                  | 95.23                  | 99.29                  | 100.00                 | 100.00                  | 100.00                  | 100.00                  | 0.86              | 5.22  | 24.45  |
| Marlstone | 4.50                  | 19.31                 | 27.31                  | 53.86                  | 73.03                  | 84.26                  | 94.71                   | 97.84                   | 100.00                  | 2.09              | 31.92 | 118.63 |
| Limestone | 5.96                  | 23.01                 | 33.45                  | 68.03                  | 86.88                  | 95.23                  | 100.00                  | 100.00                  | 100.00                  | 1.70              | 21.29 | 71.98  |
| Feldspar  | 2.81                  | 18.91                 | 32.21                  | 73.13                  | 89.84                  | 96.27                  | 100.00                  | 100.00                  | 100.00                  | 2.53              | 19.30 | 63.56  |

**Table S2.** Mix design summary

| Geopolymer designation | sample | L05 | Alkaline solution | Quartz sand | Dolomite | Marble | Marlstone | Limestone | Feldspar |
|------------------------|--------|-----|-------------------|-------------|----------|--------|-----------|-----------|----------|
|                        |        |     |                   |             |          |        |           |           |          |
|                        |        |     |                   |             |          |        |           |           |          |
| STJ 25                 |        | 50  | 50                | 61          | -        | -      | -         | -         | -        |
| Dolomite-A             |        | 50  | 50                | 61          | 8        | -      | -         | -         | -        |
| Dolomite-B             |        | 50  | 50                | 61          | 16       | -      | -         | -         | -        |
| Marble-A               |        | 50  | 50                | 61          | -        | 8      | -         | -         | -        |
| Marble-B               |        | 50  | 50                | 61          | -        | 16     | -         | -         | -        |
| Marlstone-A            |        | 50  | 50                | 61          | -        | -      | 8         | -         | -        |
| Marlstone-B            |        | 50  | 50                | 61          | -        | -      | 16        | -         | -        |
| Limestone-A            |        | 50  | 50                | 61          | -        | -      | -         | 8         | -        |
| Limestone-B            |        | 50  | 50                | 61          | -        | -      | -         | 16        | -        |
| Feldspar-A             |        | 50  | 50                | 61          | -        | -      | -         | -         | 8        |
| Feldspar-B             |        | 50  | 50                | 61          | -        | -      | -         | -         | 16       |

**Table S3.** XRD analyses of the stone powder used

|           | Major                                                                                                                                                                                     | Minor                                                                                                                                                                                                                                             | Traces                                                                                                               |
|-----------|-------------------------------------------------------------------------------------------------------------------------------------------------------------------------------------------|---------------------------------------------------------------------------------------------------------------------------------------------------------------------------------------------------------------------------------------------------|----------------------------------------------------------------------------------------------------------------------|
| L05       | Quartz (SiO <sub>2</sub> )<br>Amorphous phase                                                                                                                                             | Anatase (TiO <sub>2</sub> )                                                                                                                                                                                                                       | Muscovite<br>(KAl <sub>2</sub> (Si <sub>3</sub> Al)O <sub>10</sub> (OH) <sub>2</sub> )<br>Goethite (FeO(OH))         |
| Dolomite  | Dolomite (CaMg(CO <sub>3</sub> ) <sub>2</sub> )                                                                                                                                           | Calcite magnesian<br>(Mg <sub>0.064</sub> Ca <sub>0.936</sub> CO <sub>3</sub> )                                                                                                                                                                   | Quartz (SiO <sub>2</sub> )<br>Biotite<br>(KFeMg <sub>2</sub> (AlSi <sub>3</sub> O <sub>10</sub> )(OH) <sub>2</sub> ) |
| Marble    | Calcite magnesian<br>(Mg <sub>0.064</sub> Ca <sub>0.936</sub> CO <sub>3</sub> )                                                                                                           | Dolomite (CaMg(CO <sub>3</sub> ) <sub>2</sub> )                                                                                                                                                                                                   | Quartz (SiO <sub>2</sub> )                                                                                           |
| Marlstone | Magnesium calcite<br>(Mg <sub>0.03</sub> Ca <sub>0.97</sub> CO <sub>3</sub> )<br>Quartz (SiO <sub>2</sub> )                                                                               | Muscovite<br>(KAl <sub>2</sub> (Si <sub>3</sub> Al)O <sub>10</sub> (OH) <sub>2</sub> )<br>Microcline<br>(K <sub>0.904</sub> Na <sub>0.085</sub> Ca <sub>0.005</sub> Ba <sub>0.006</sub><br>Al <sub>0.95</sub> Si <sub>3.05</sub> O <sub>8</sub> ) | Kaolinite (Al <sub>2</sub> Si <sub>2</sub> O <sub>5</sub> (OH) <sub>4</sub> )<br>Cristobalite (SiO <sub>2</sub> )    |
| Limestone | Magnesium calcite<br>(Mg <sub>0.03</sub> Ca <sub>0.97</sub> CO <sub>3</sub> )                                                                                                             |                                                                                                                                                                                                                                                   | Quartz (SiO <sub>2</sub> )                                                                                           |
| Feldspar  | Microcline<br>(K <sub>0.94</sub> Na <sub>0.06</sub> Al <sub>0.95</sub> Si <sub>3.05</sub> O <sub>8</sub> )<br>Albite (Na(AlSi <sub>3</sub> O <sub>8</sub> )<br>Quartz (SiO <sub>2</sub> ) | Muscovite<br>(KAl <sub>2</sub> (Si <sub>3</sub> Al)O <sub>10</sub> (OH) <sub>2</sub> )                                                                                                                                                            | Kaolinite (Al <sub>2</sub> Si <sub>2</sub> O <sub>5</sub> (OH) <sub>4</sub> )                                        |

**Table S4.** XRD analyses of geopolymers with different types of waste stone powder

|             | Major                                         | Minor                                                                                                                                                        | Traces                                                                                                                |
|-------------|-----------------------------------------------|--------------------------------------------------------------------------------------------------------------------------------------------------------------|-----------------------------------------------------------------------------------------------------------------------|
| STJ 25      | Quartz (SiO <sub>2</sub> )<br>Amorphous phase | -                                                                                                                                                            | Anatase (TiO <sub>2</sub> )                                                                                           |
| Dolomite-B  | Quartz (SiO <sub>2</sub> )<br>Amorphous phase | Dolomite (CaMg(CO <sub>3</sub> ) <sub>2</sub> )                                                                                                              | Anatase (TiO <sub>2</sub> )<br>Calcite magnesian<br>(Mg <sub>0.064</sub> Ca <sub>0.936</sub> CO <sub>3</sub> )        |
| Marble-B    | Quartz (SiO <sub>2</sub> )<br>Amorphous phase | Calcite magnesian<br>(Mg <sub>0.064</sub> Ca <sub>0.936</sub> CO <sub>3</sub> )                                                                              | Anatase (TiO <sub>2</sub> )<br>Dolomite (CaMg(CO <sub>3</sub> ) <sub>2</sub> )                                        |
| Marlstone-B | Quartz (SiO <sub>2</sub> )<br>Amorphous phase | Magnesium calcite<br>(Mg <sub>0.03</sub> Ca <sub>0.97</sub> CO <sub>3</sub> )                                                                                | Anatase (TiO <sub>2</sub> )                                                                                           |
| Limestone-B | Quartz (SiO <sub>2</sub> )<br>Amorphous phase | Magnesium calcite<br>(Mg <sub>0.03</sub> Ca <sub>0.97</sub> CO <sub>3</sub> )                                                                                | Anatase (TiO <sub>2</sub> )                                                                                           |
| Feldspar-B  | Quartz (SiO <sub>2</sub> )<br>Amorphous phase | Microcline<br>(K <sub>0.94</sub> Na <sub>0.06</sub> Al <sub>0.95</sub> Si <sub>3.05</sub> O <sub>8</sub> )<br>Albite (Na(AlSi <sub>3</sub> O <sub>8</sub> )) | Anatase (TiO <sub>2</sub> )<br>Muscovite<br>(KAl <sub>2</sub> (Si <sub>3</sub> Al)O <sub>10</sub> (OH) <sub>2</sub> ) |

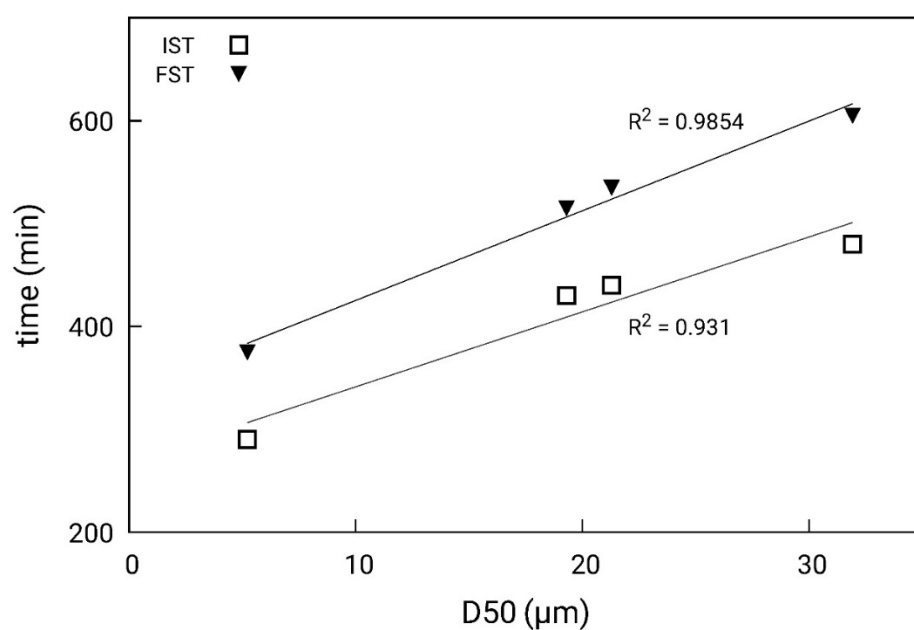**Figure S1.** The dependence of solidification time on WSP particle sizes

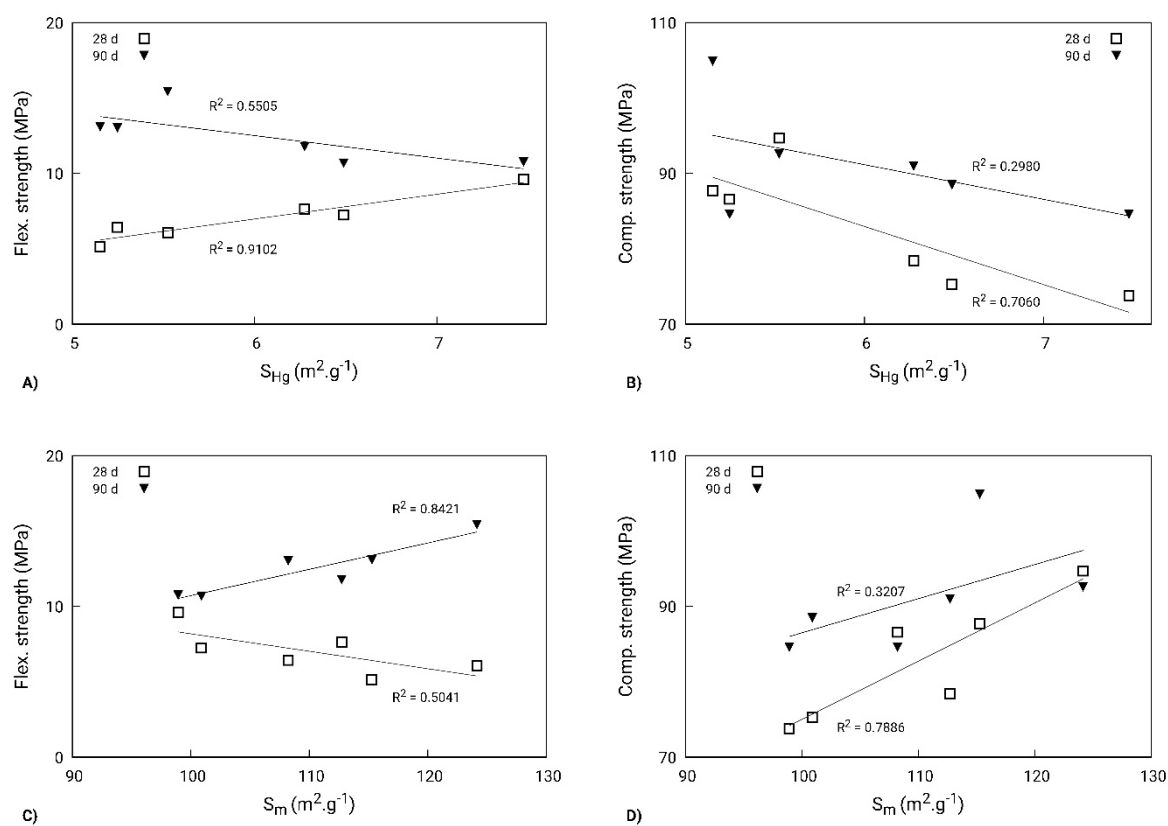

**Figure S2.** The dependence of strength factors on pore content: A) flexural strength on meso- and macropore content, B) compressive strength on meso- and macropore content, C) flexural strength on micropore content, D) compressive strength on micropore content
